# Supplementary figures and images for: Implementing use of sucrose analgesia (non-pharmacological management of neonatal pain) in a standalone private facility level 3 neonatal care unit using point of care quality improvement methodology
Source: PubMed Central journal article supplement — BMJ Open Qual. 2022 Jun 15;11(Suppl 1):e001830. doi: 10.1136/bmjoq-2022-001830 (PMC9204459; doi:10.1136/bmjoq-2022-001830), 2022-06-15

## Fishbone Diagram

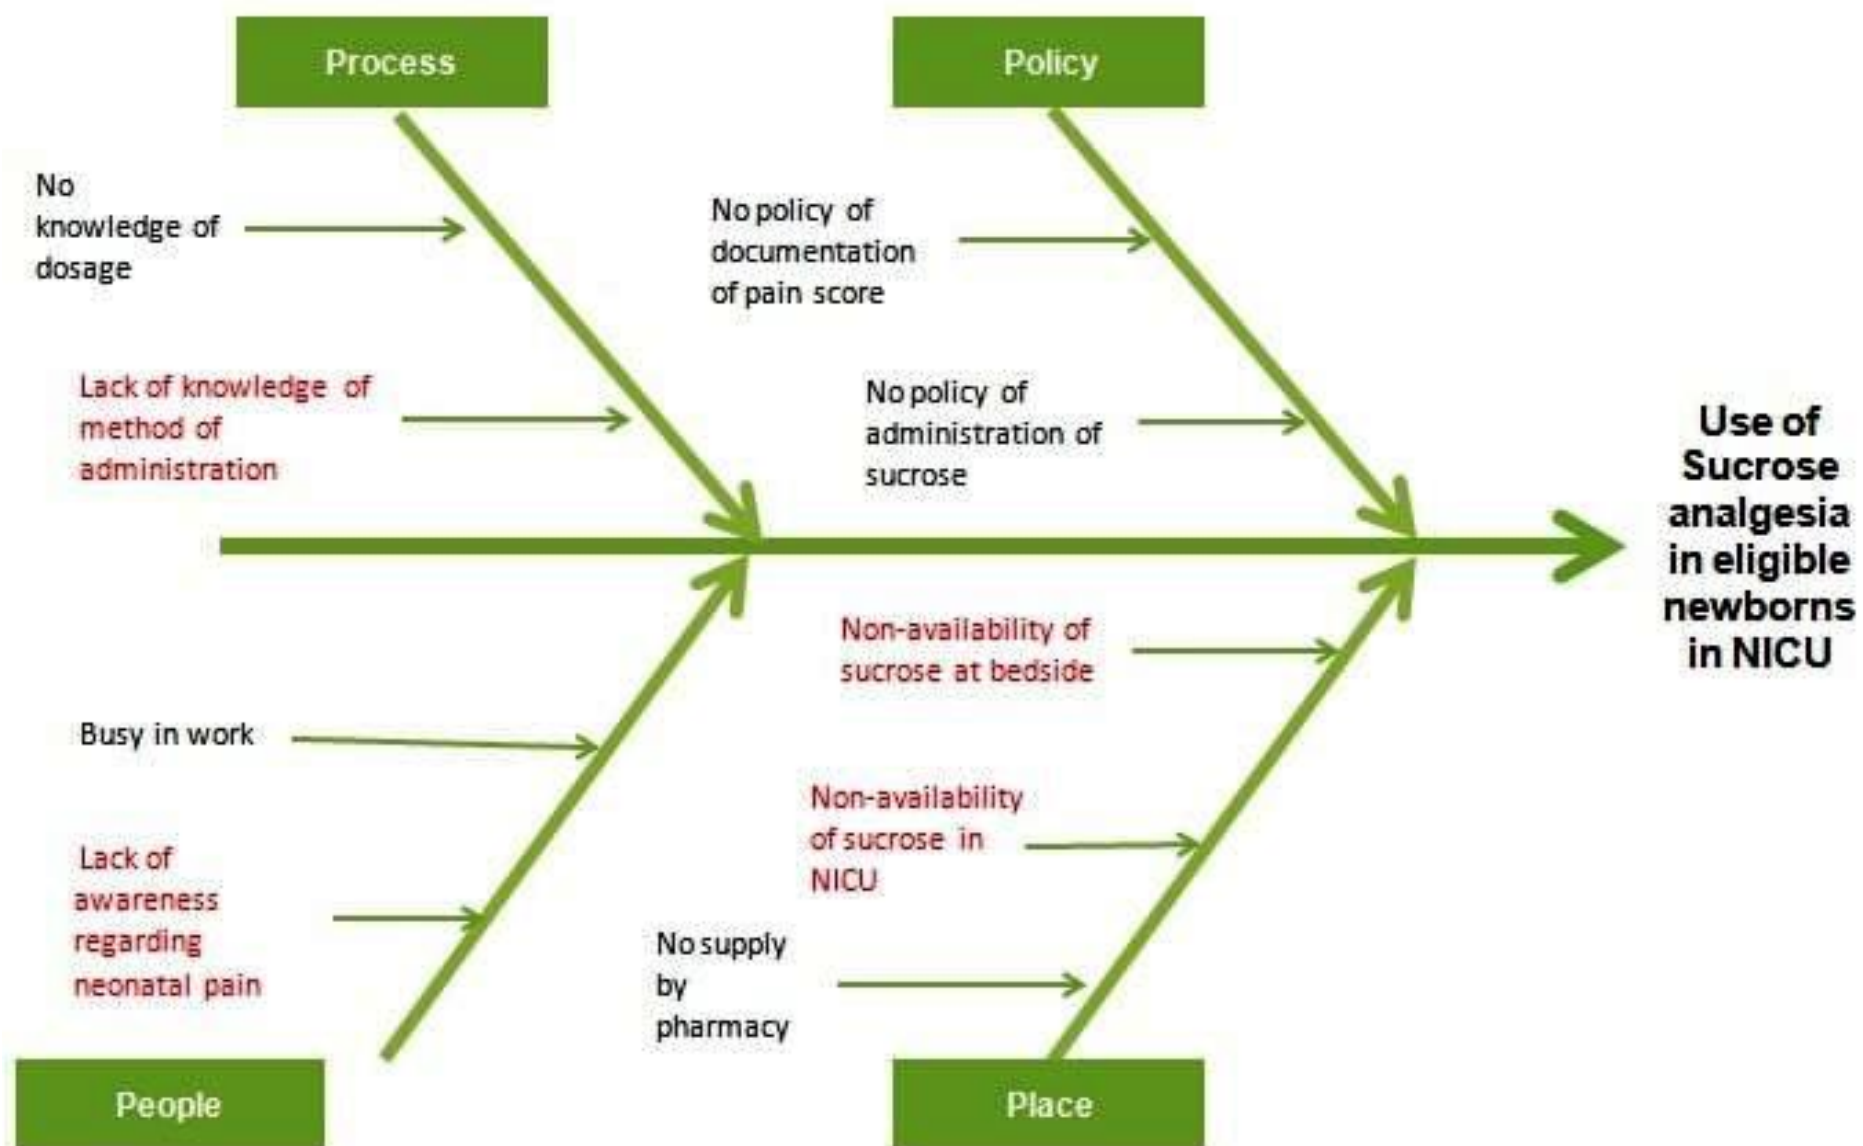

Supplement: bmjoq-2022-001830supp001.pdf [file bmjoq-2022-001830supp001.pdf]
